# Supplementary material
Source: Springer Nature journal article supplement (https://www.springermedizin.de/resource/supplementary/12874_2010_510_MOESM2_ESM.pdf/9432028)

**a) Data generating process 2**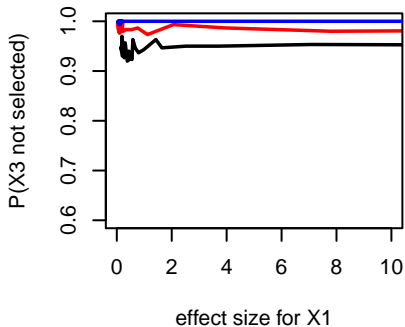**b) Data generating process 3**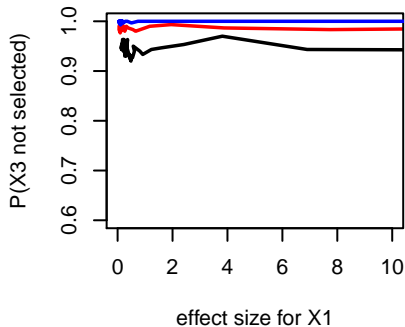**c) Data generating process 4**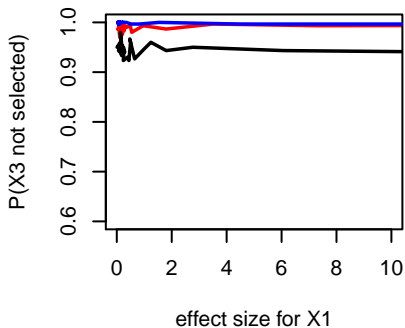**d) Data generating process 4**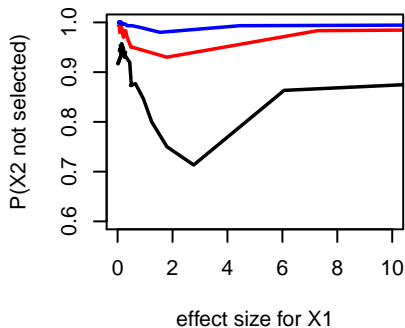**e) Data generating process 5**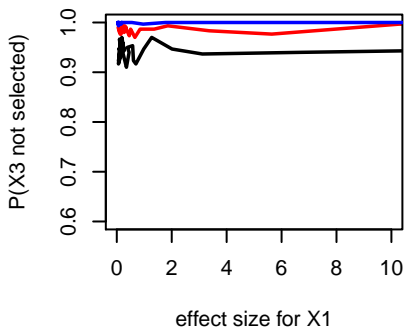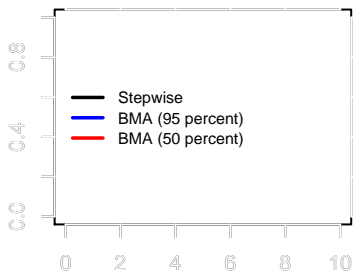

Supplement: MOESM2 [file 9432028]
